# Supplementary material
Source: ML conference proceedings conference paper supplement (https://proceedings.neurips.cc/paper_files/paper/2022/hash/27c546ab1e4f1d7d638e6a8dfbad9a07-Abstract.html)
Supplement: Supplementary file 1 [file 27c546ab1e4f1d7d638e6a8dfbad9a07-Supplemental-Conference.zip]

Archive with 2 entries (2 files):
- procthor-supplementary.pdf
- __MACOSX/._procthor-supplementary.pdf
